# Supplementary material for: Improving nelarabine efficacy in T cell acute lymphoblastic leukemia by targeting aberrant PI3K/AKT/mTOR signaling pathway
Source: Springer Nature journal article supplement (doi:10.1186/s13045-016-0344-4), 2016-10-24
Supplement: MOESM4 [file 10982378]

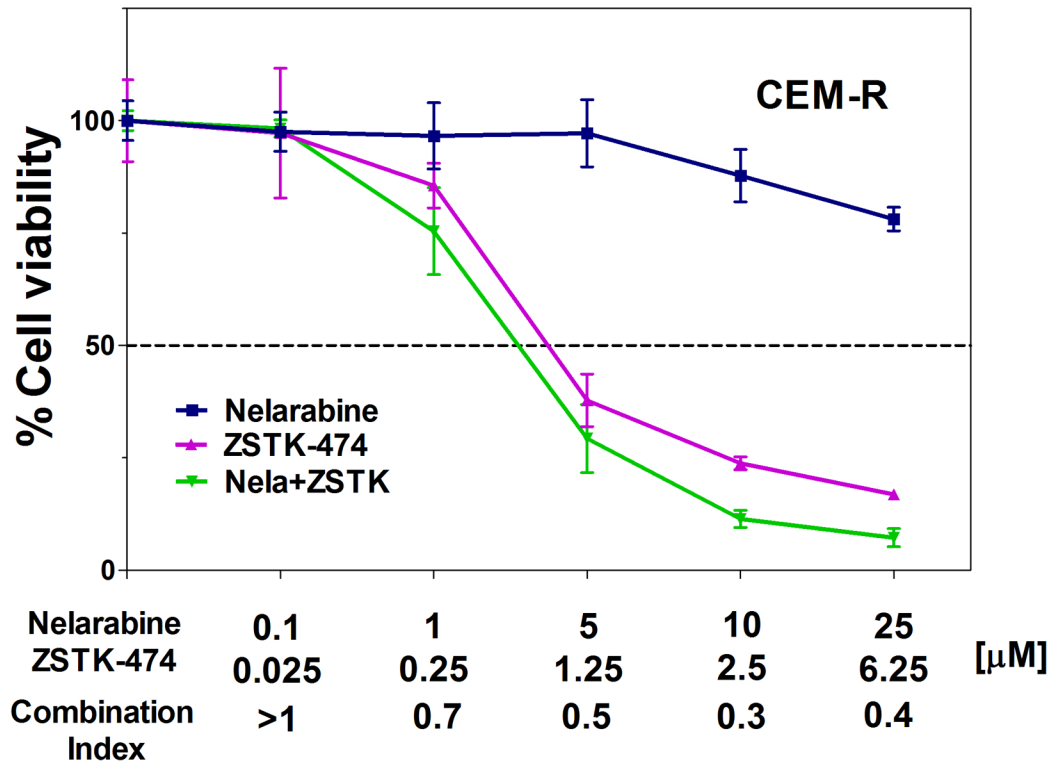

**Additional fig 4**
